# Supplementary material for: Targeting late-stage non-small cell lung cancer with a combination of DNT cellular therapy and PD-1 checkpoint blockade
Source: Springer Nature journal article supplement (doi:10.1186/s13046-019-1126-y), 2019-03-11
Supplement: MOESM2 [file 16538476]

Figure S1.

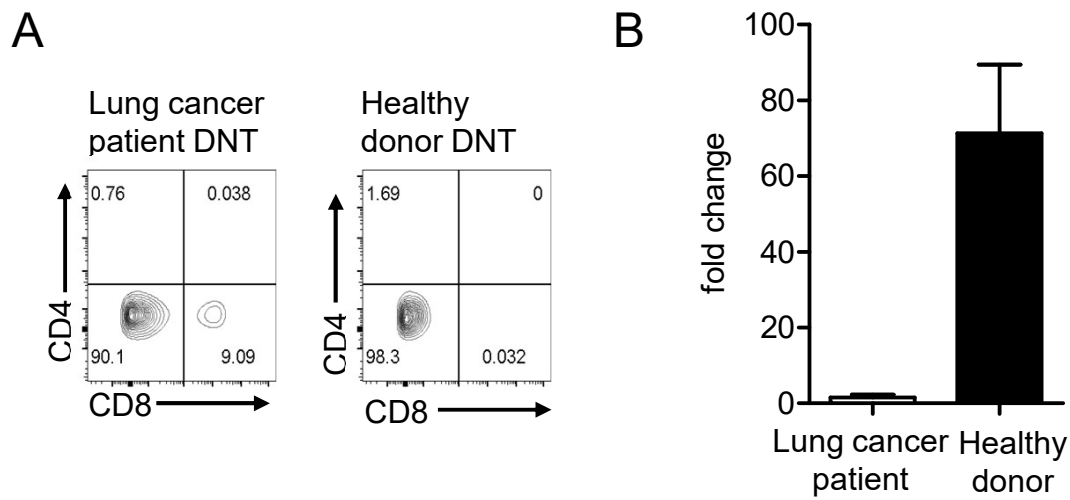

**Figure S1. Purity and yield of lung cancer patient- and healthy donor-derived DNT cells.** Lung cancer patient-derived DNT cells (n=4) or healthy donor-derived DNT cells (n=5) were expanded as described in the Materials and Methods and analyzed for their phenotype (**A**) and yield (**B**) 14 days after expansion.

Figure S2.

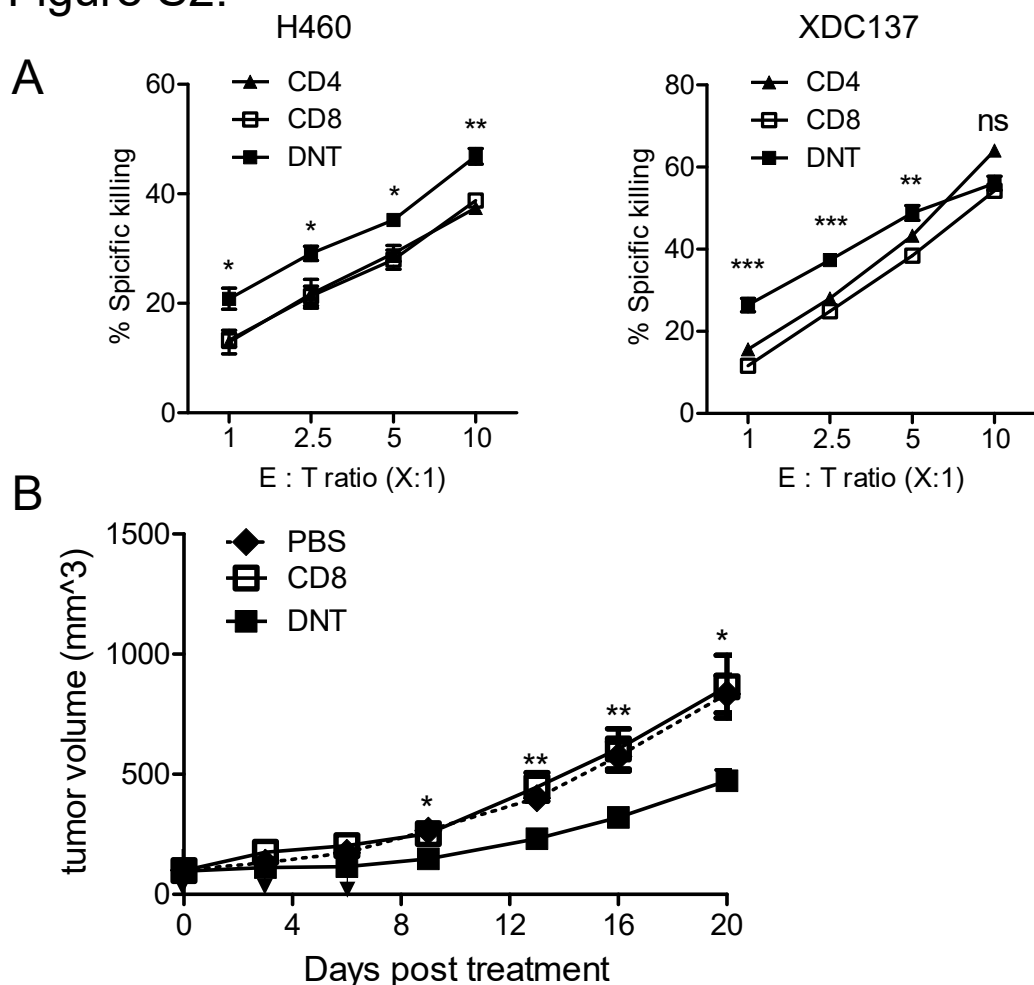

**Figure S2. A.** Healthy donor derived DNT, CD4 and CD8 T cells were co-cultured with indicated lung cancer cell lines at various T cell to tumor cell ratios for 12-14hr. % specific killing of target cells is shown. The results represent 3 independent experiments from 3 different donors, each with triplicate cultures. Results shown as mean  $\pm$  SEM. \* $p < 0.05$ , \*\* $p < 0.01$ , \*\*\* $p < 0.001$  indicate the differences in the cytotoxicity of DNT versus CD8 T cells at indicated E:T ratios by two-tailed unpaired t-test. **B.** NSG mice were inoculated subcutaneously with NCI-H460 in 50% Matrigel solution and grown to  $\sim 100$ mm<sup>3</sup>. After tumors were established, tumor bearing mice were randomized into groups and treated with peritumoral injection of IL-2 with or without DNT or CD8 T cells from the same donor on day 0, 3 and 6. Tumor volume was measured at indicated time points. Results represent one of two independent experiments, each had 5 mice per treatment group. Results shown as mean  $\pm$  SEM. \* $p < 0.05$ , \*\* $p < 0.01$  show the difference in tumor volume at indicated time-points between DNT and CD8 treated groups by two-tailed unpaired student t-test.

Figure S3.

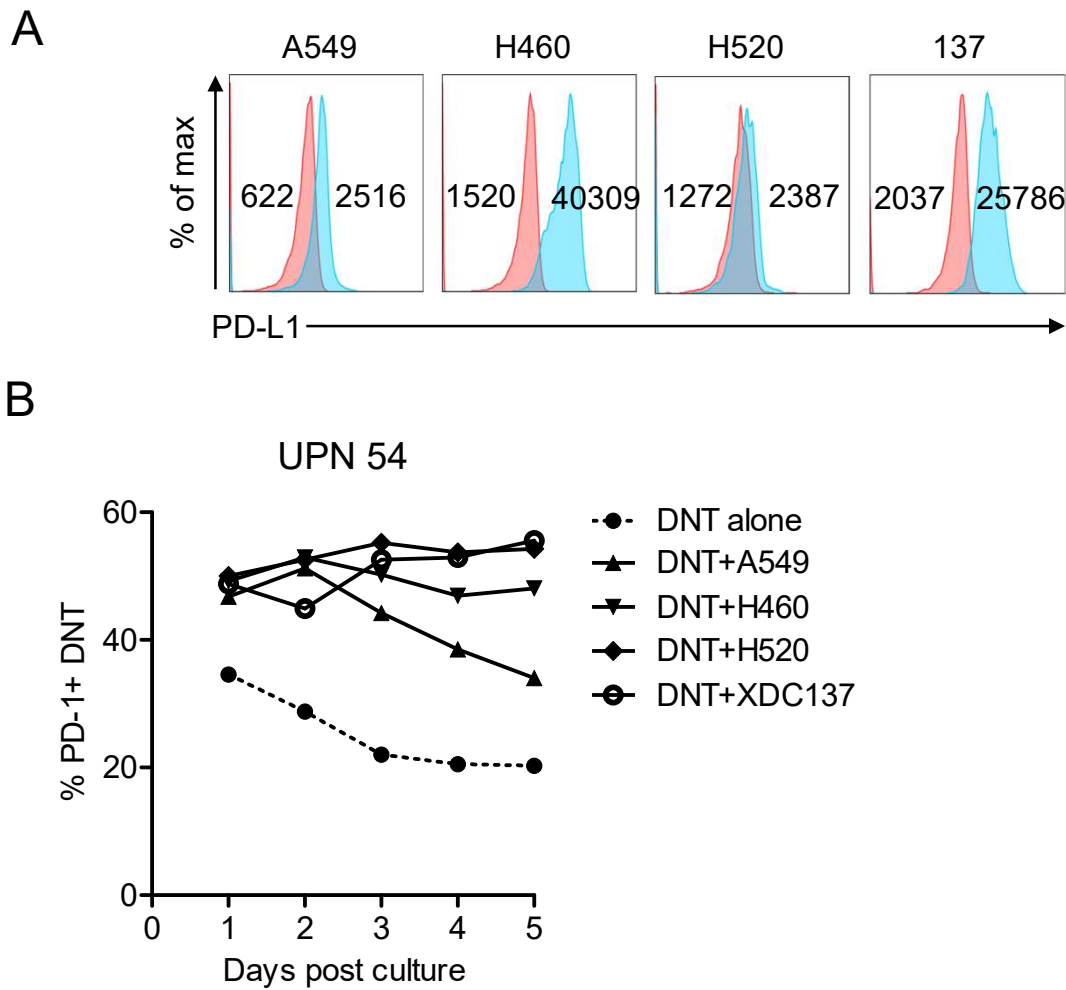

**Figure S3. A.** The expression of PD-L1 on NSCLC cell lines. NSCLC cell lines were stained with either anti-human PD-L1 (blue histograms) or control (red histograms), numbers represent MFI. **B.** Time course of PD-1 expression on expanded DNT cells, cultured alone or with various NSCLC cell lines for varying time points. Results represent the data obtained from 2 different donors.

Figure S4.

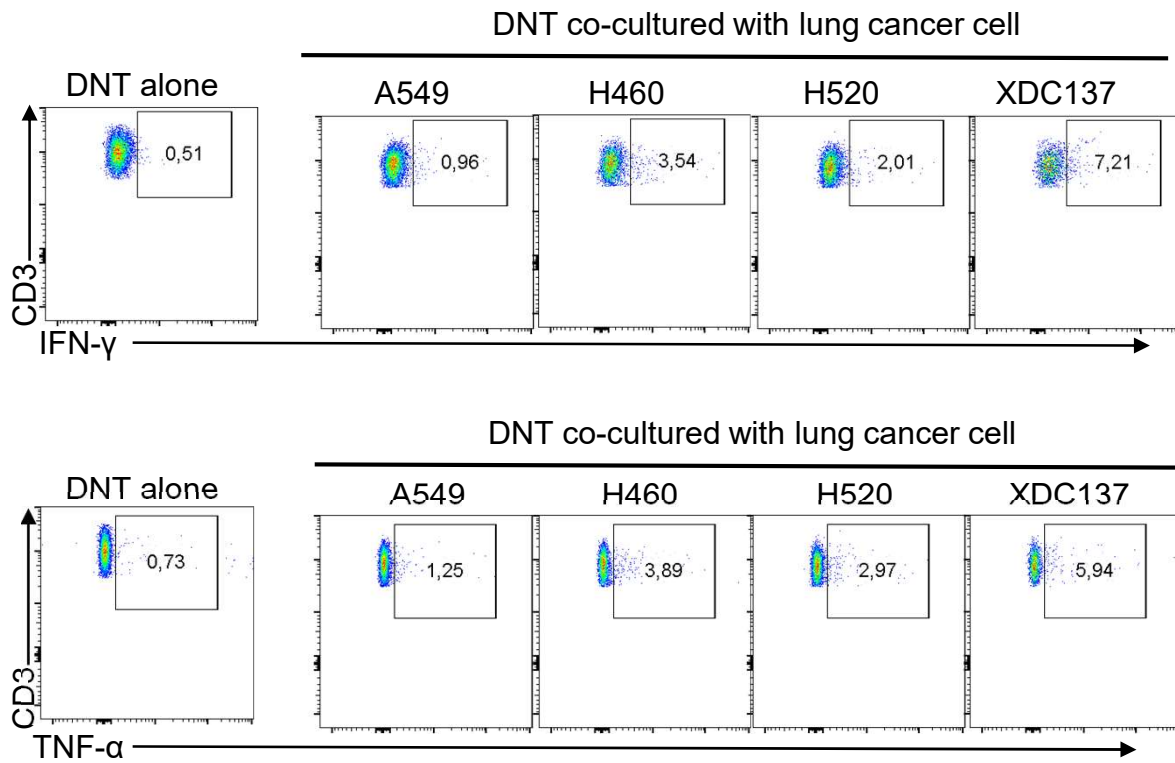

**Figure S4.** Intracellular cytokine analysis of DNT cells, either cultured alone or with various NSCLC cell lines. Expanded DNT cells were culture alone or co-cultured with indicated NSCLC cell lines for 48hr and prior to analysis of indicated intracellular cytokines. % IFN- $\gamma$  and TNF- $\alpha$  positive DNT cells are shown.

Figure S5.

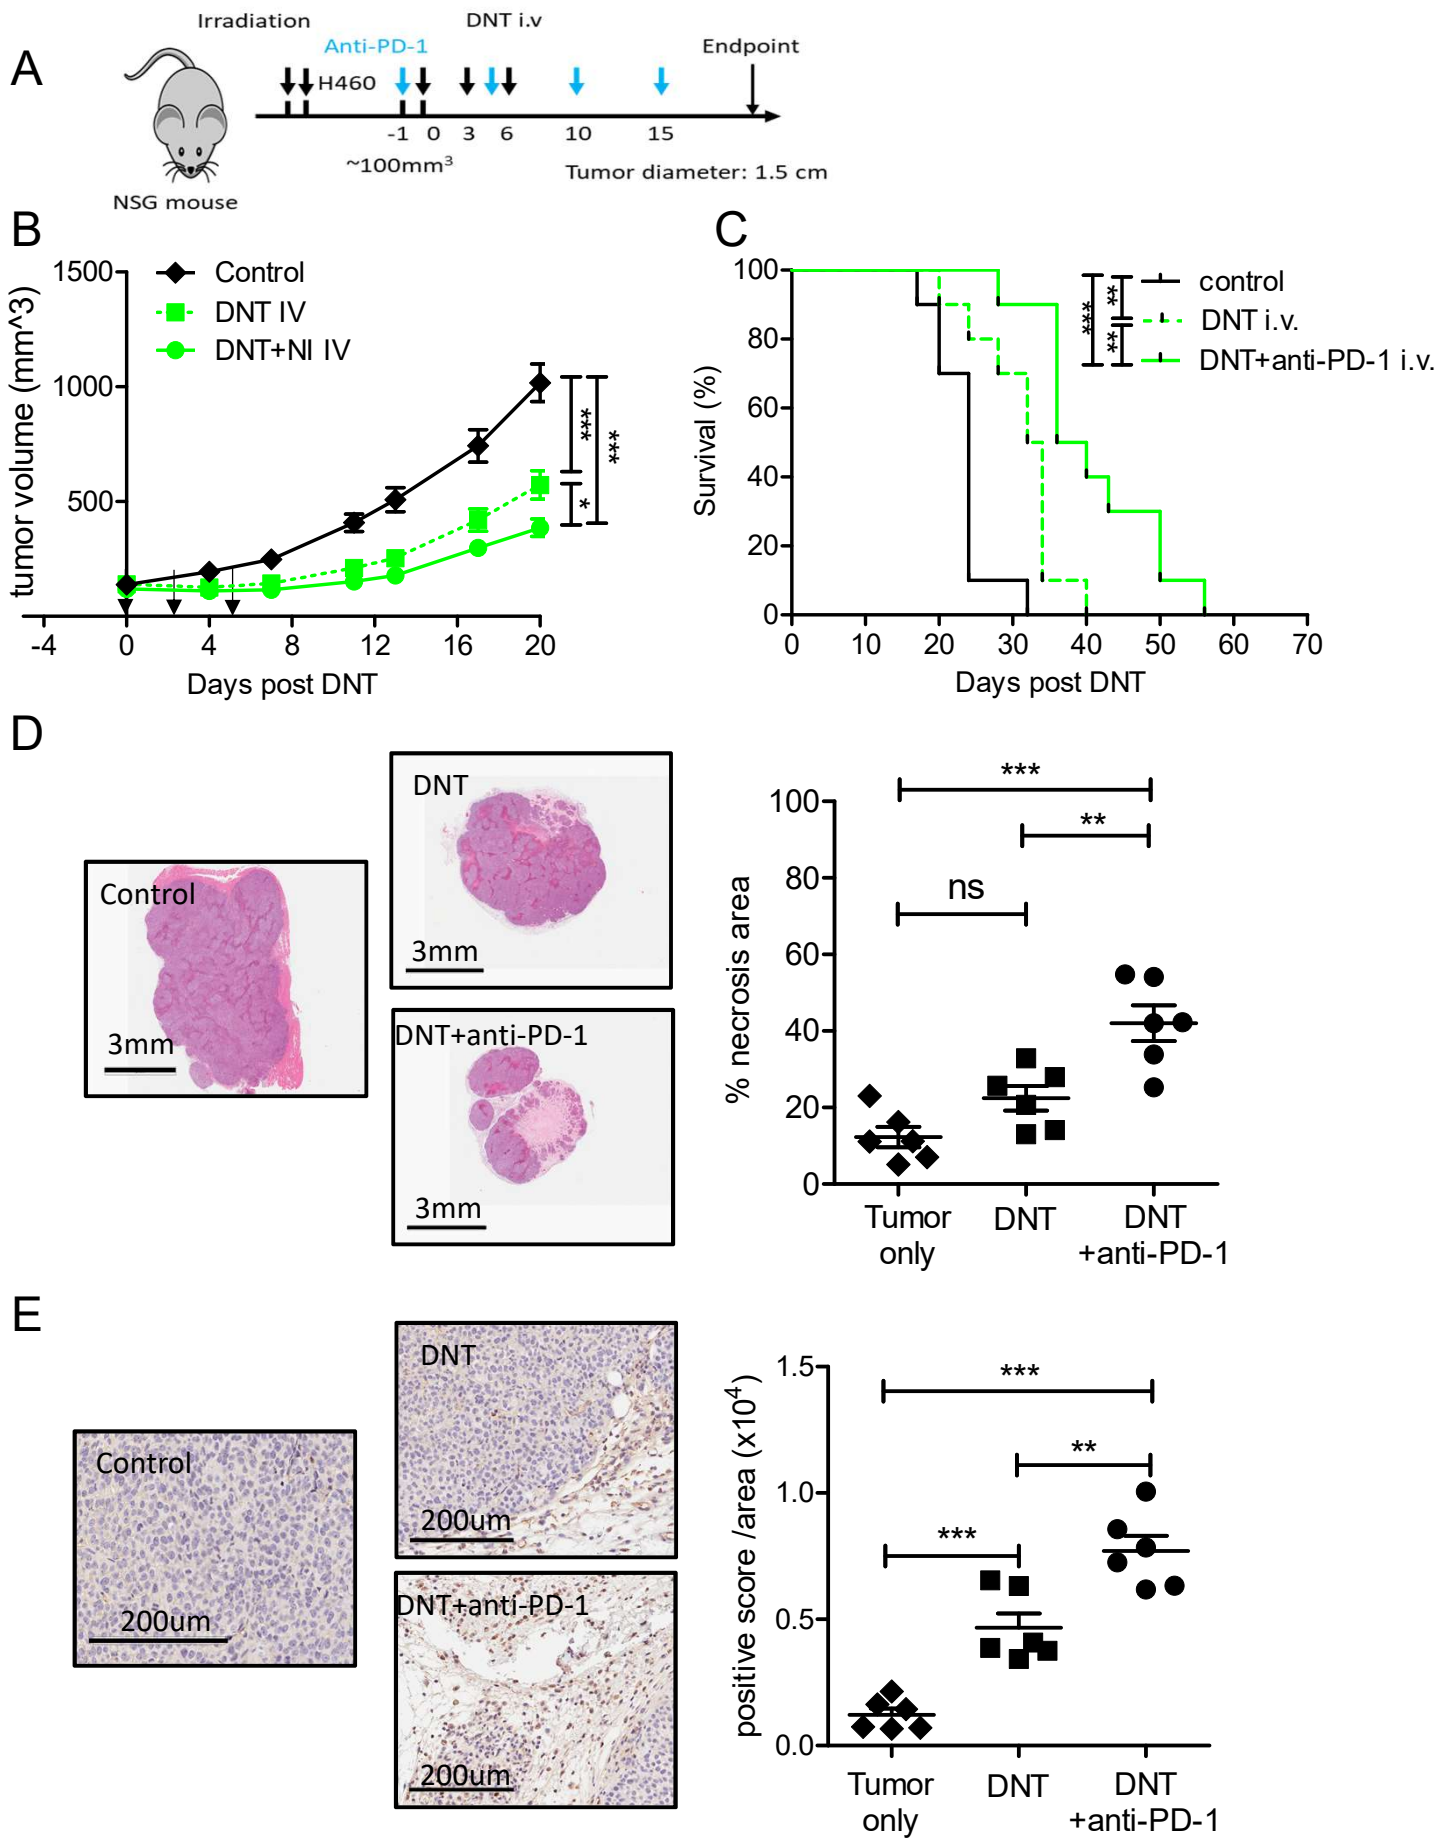

**Figure S5. Anti-PD-1 antibody enhances efficacy of DNT cell mediated anti-tumor response and DNT cell tumor infiltration in late stage tumor xenograft model.** NSG mice were inoculated subcutaneously with NCI-H460 in 50% Matrigel solution and tumors were allowed to grow to  $\sim 100\text{mm}^3$ . After tumors were established, tumor bearing mice were randomized and received intravenous injection of IL-2 (control treatment) or DNT cell plus IL-2 on days 0, 3 and 6. Additionally, some mice received PBS or anti-PD-1 antibody (10mg/kg repeated every 5 days i.p., starting one day prior to 1st DNT cell infusion to the end of the experiment). **A.** Schematic diagram of the treatment protocol of NCI-H460 xenograft model. **B.** Tumor volume were measured at indicated time points (n=10 for each group). **C.** Humane end point survival of treated mice (n=10 for each group). **D.** Representative H&E staining of xenografts from indicated treatment groups 9 days post DNT cell infusion and percent necrotic area in tumors from indicated treatment groups calculated by histological analysis. **E.** Immunohistochemical analysis of CD3<sup>+</sup> human T cells in tumor xenografts 9 days post DNT cell infusion. Representative staining and analysis of tumor infiltrating DNT cells in indicated treatment groups. Results shown as mean  $\pm$  SEM, from untreated, DNT (n=6) or DNT plus anti-PD1 treatment groups (n=6). Results shown are representative of 2 separate experiments. \*\*p<0.01, \*\*\*p<0.001, by two-tailed unpaired t-test (**B**), by log-rank test (**C**) or by one-way ANOVA (**D and E**).

Figure S6.

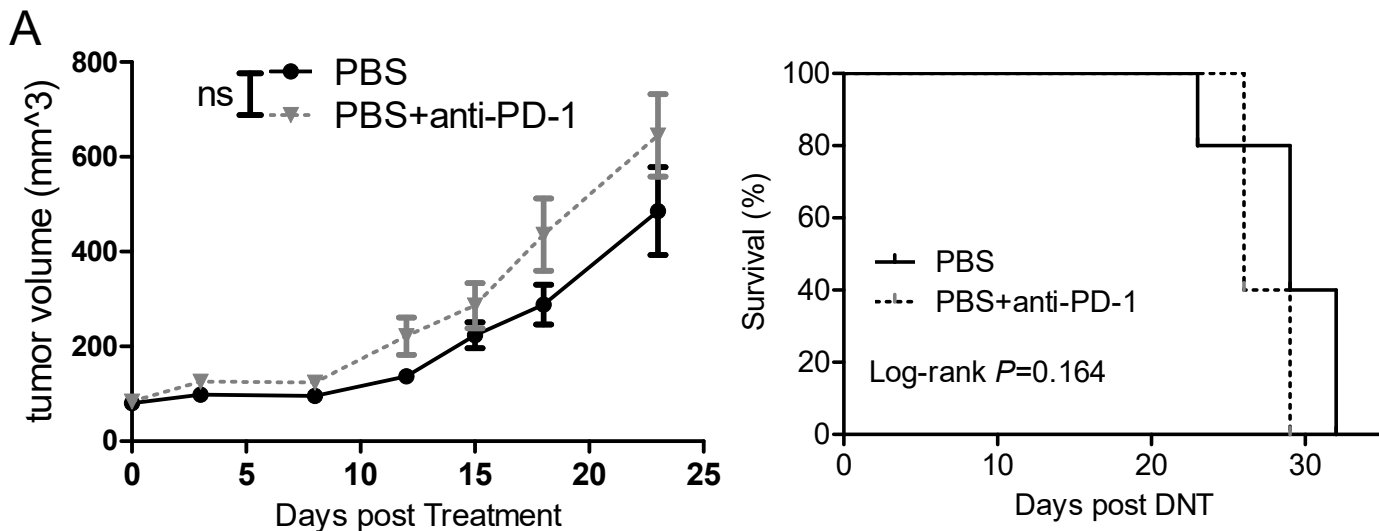

**Figure S6. Treatment with anti-PD-1 alone has no effect on NCI-H460 xenograft growth or mouse survival. A.** NSG mice were inoculated subcutaneously with NCI-H460 in 50% Matrigel solution and grown to  $\sim 100\text{mm}^3$ , and treated with 10mg/kg anti-PD-1 or PBS i.p. every 5 days to the end of the experiment. Tumor volume and recipient survival were monitored (n=5 for each group).

Figure S7.

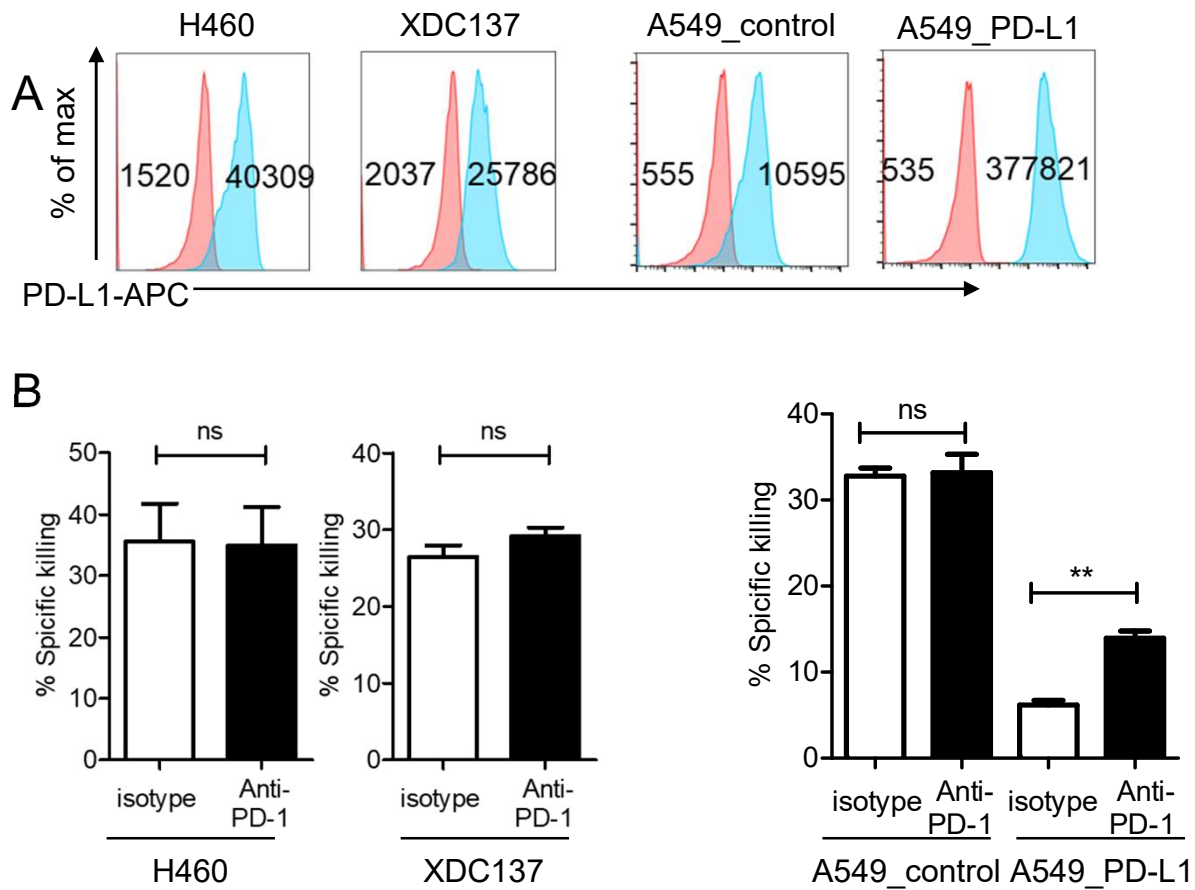

**Figure S7. A.** The expression of PDL1 on NSCLC cell line H460, XDC137, A549 control vector and A549 PD-L1 overexpressing cell line. NSCLC cell lines were stained with either anti human PD-L1(blue histograms) or control (red histograms), values represent MFI. **B.** DNT cells were co-cultured with indicated lung cancer cell lines at a 5 to 1 DNT cell to tumor cell ratio. % specific killing of target cells is shown. Results shown as mean  $\pm$  SEM. The results represent 3 independent experiments each with triplicate cultures. \*\* $p < 0.01$ , by two-tailed unpaired t-test.
